# Supplementary material for: Solution-processable, high current efficiency deep-blue organic light-emitting diodes based on novel biphenyl-imidazole derivatives
Source: Royal Society of Chemistry journal article supplement (doi:10.1039/d0tc02148b), 2020-01-01
Supplement: d0tc02148b1.pdf [file d0tc02148b1.pdf]

## Supporting information

### Solution-processable, High Current Efficiency Deep-blue Organic Light Emitting Diodes Based on Novel Biphenyl-Imidazole Derivatives

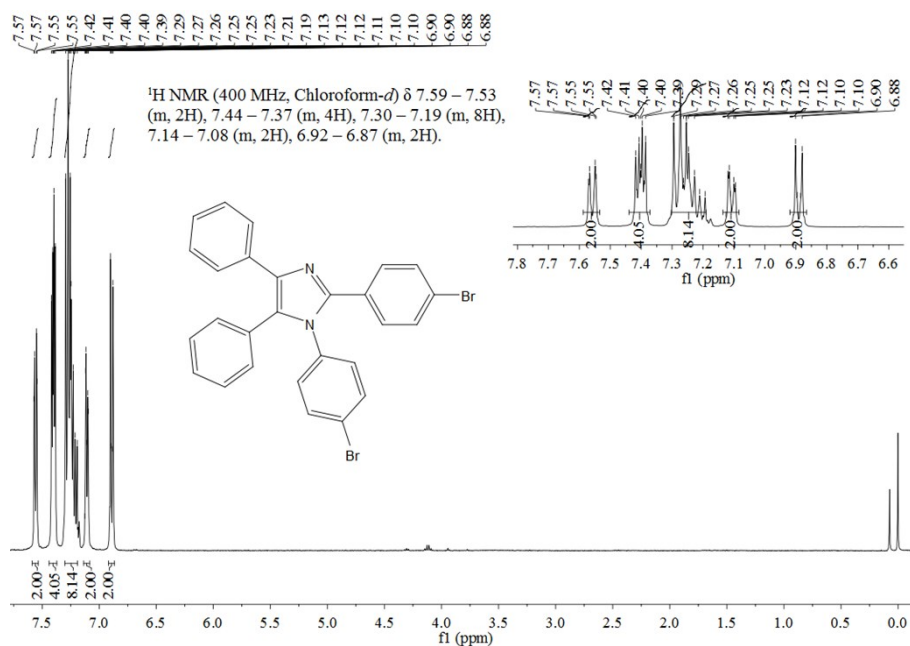

Fig. S1 <sup>1</sup>H NMR spectrum of compound 1.

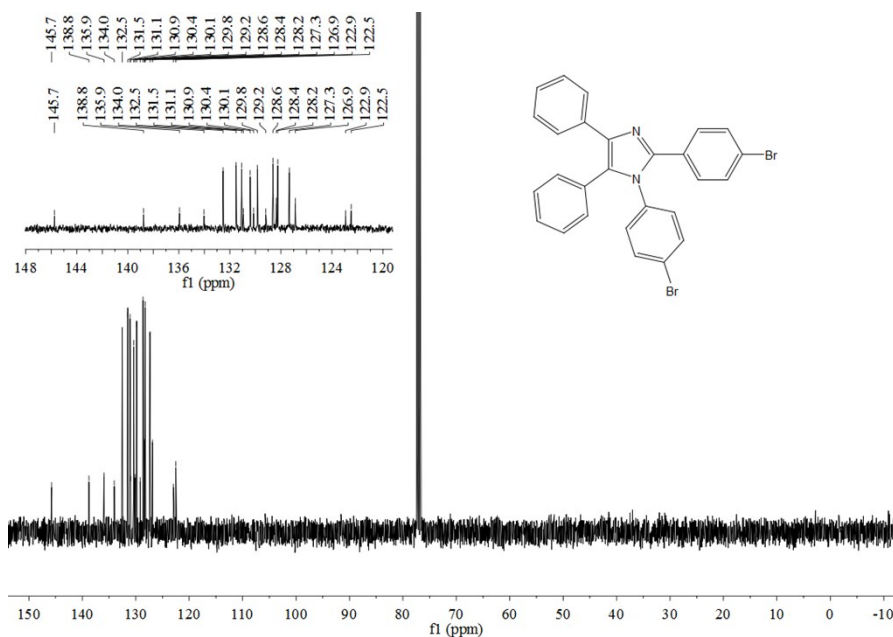

Fig. S2 <sup>13</sup>C NMR spectrum of compound 1.

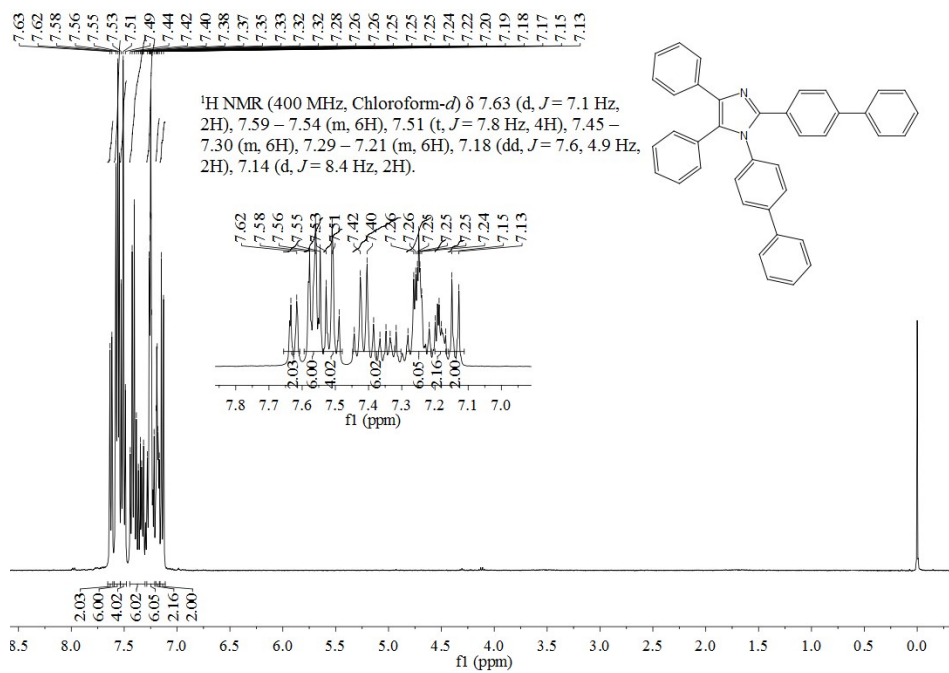

Fig. S3 <sup>1</sup>H NMR spectrum of compound 2a.

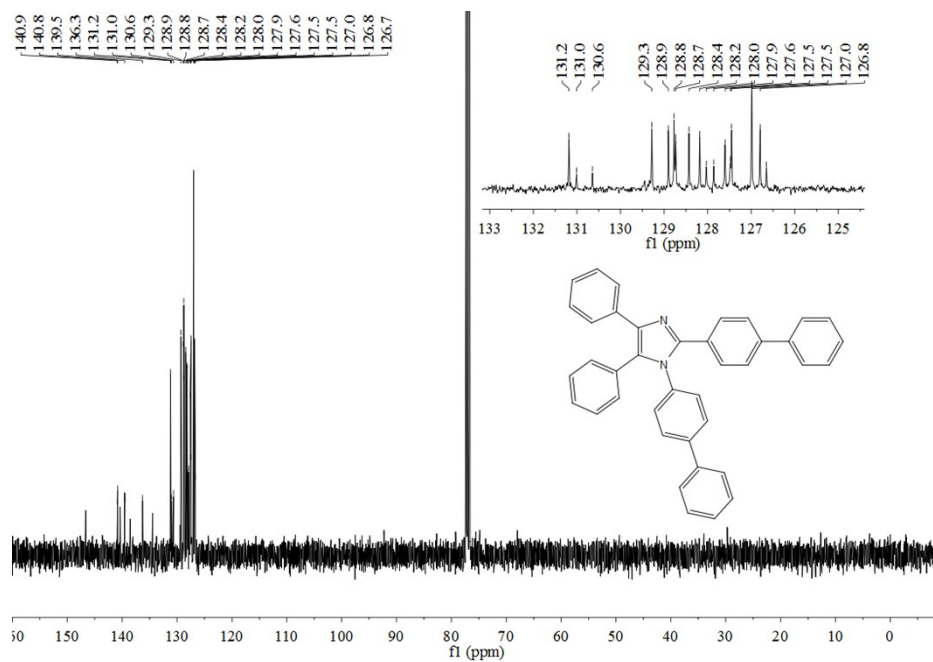

Fig. S4 <sup>13</sup>C NMR spectrum of compound 2a.

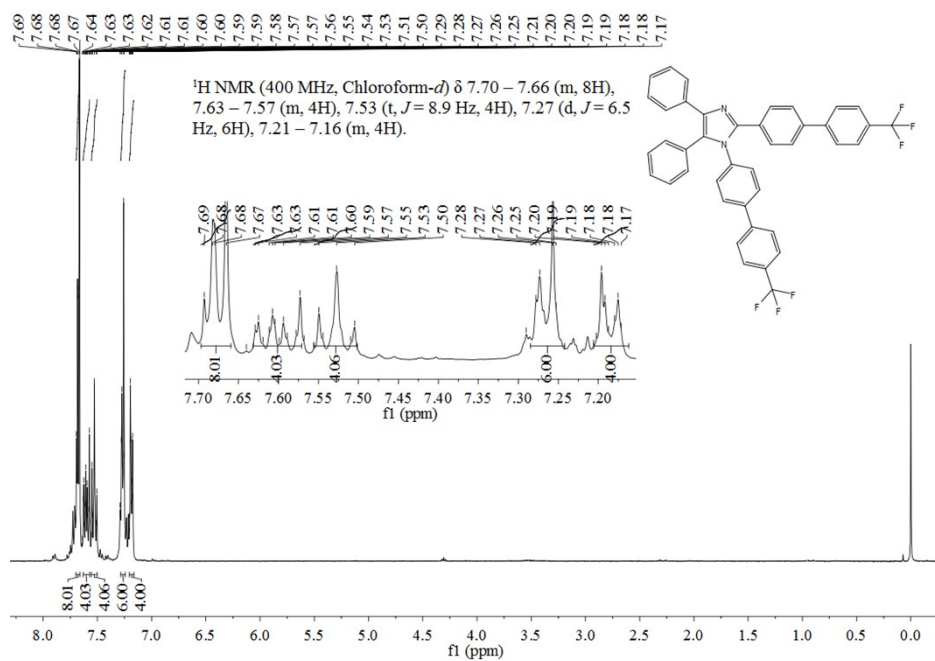

Fig. S5 <sup>1</sup>H NMR spectrum of compound **2b**.

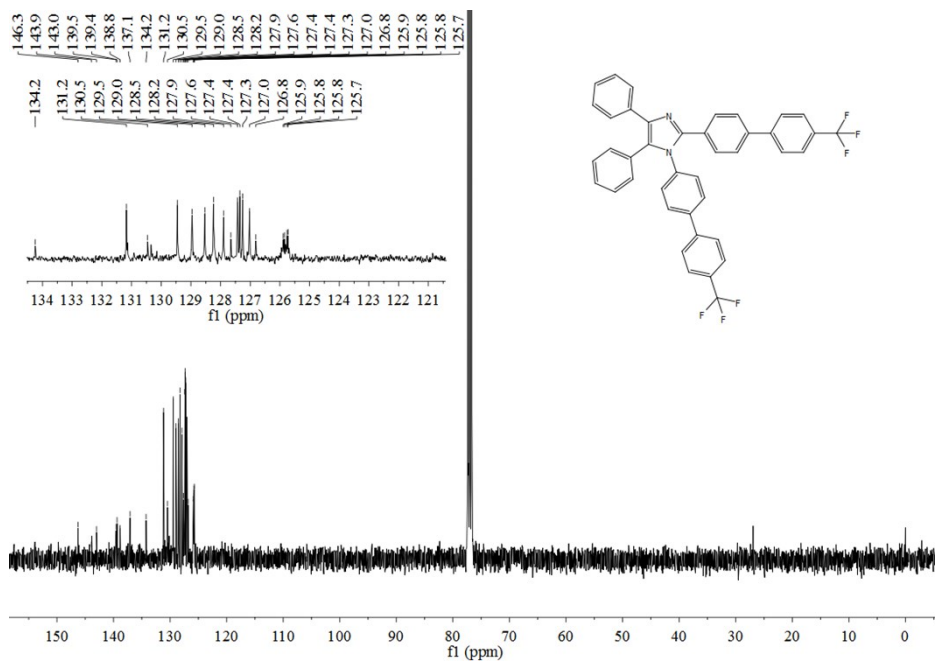

Fig. S6 <sup>13</sup>C NMR spectrum of compound **2b**.

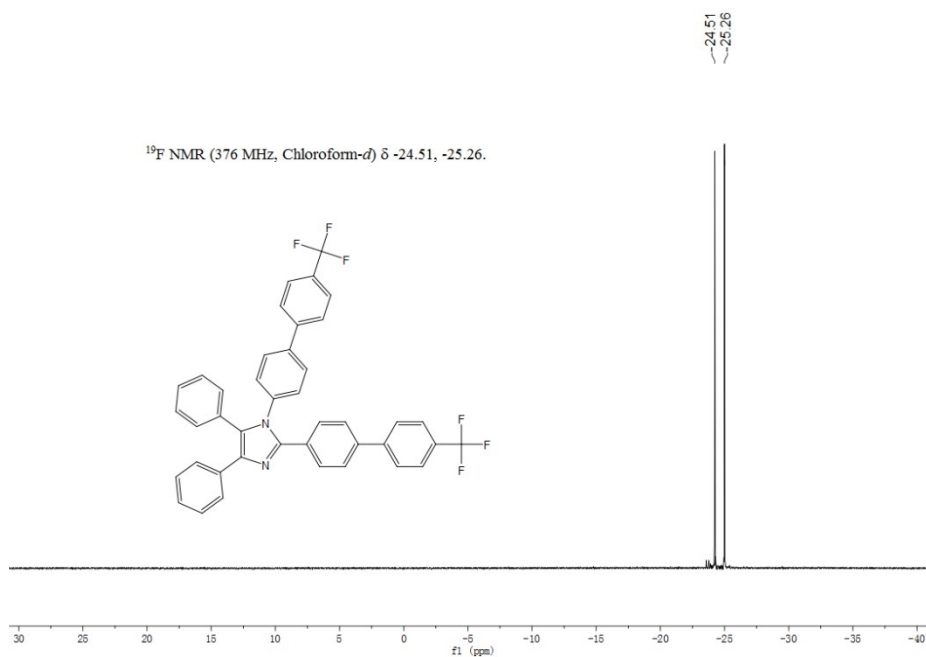

Fig. S7 <sup>19</sup>F NMR spectrum of compound **2b**.

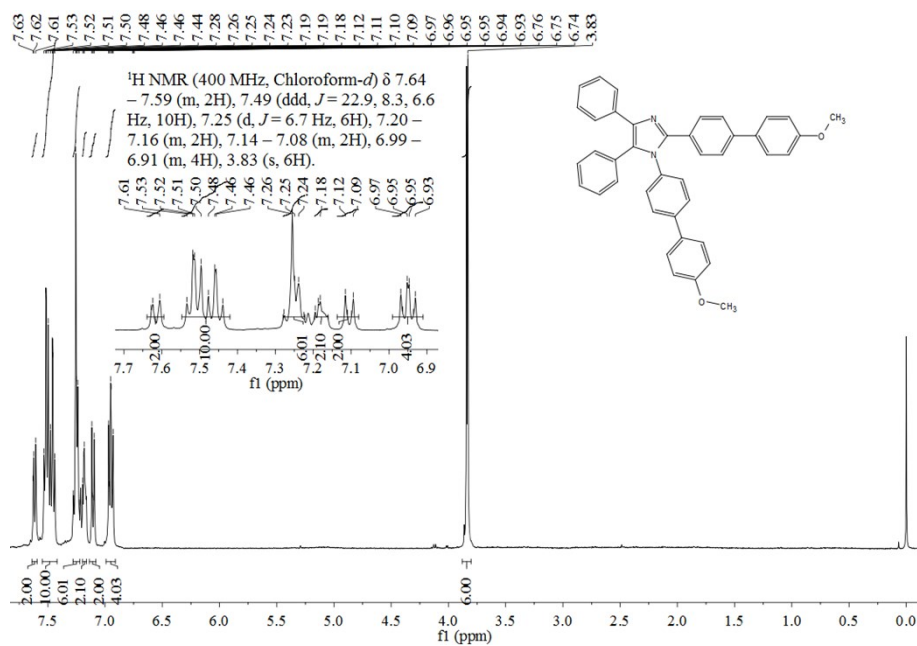

Fig. S8 <sup>1</sup>H NMR spectrum of compound **2c**.

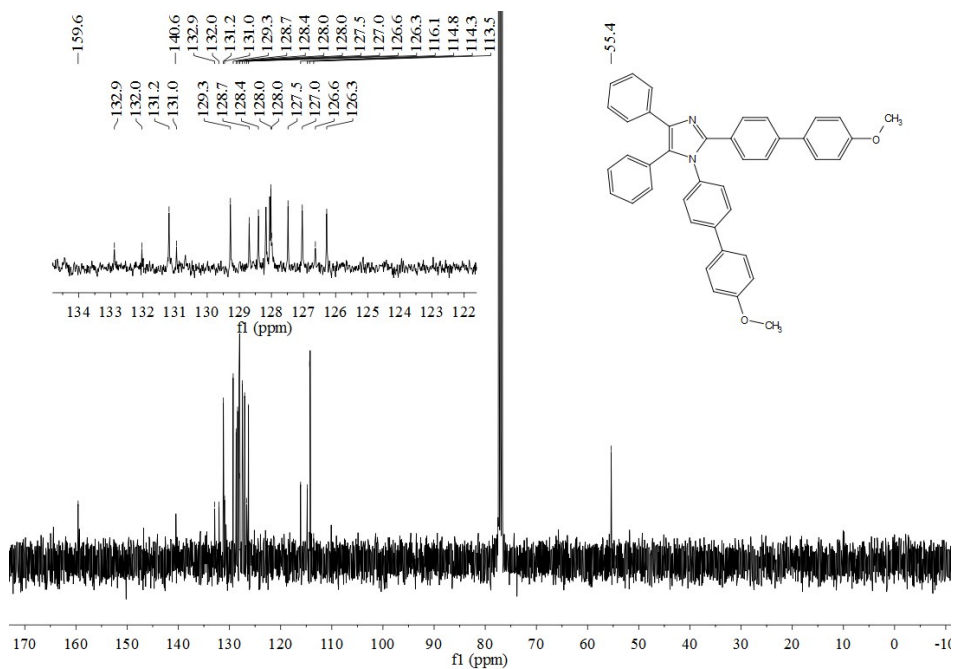

Fig. S9  $^{13}\text{C}$  NMR spectrum of compound 2c.

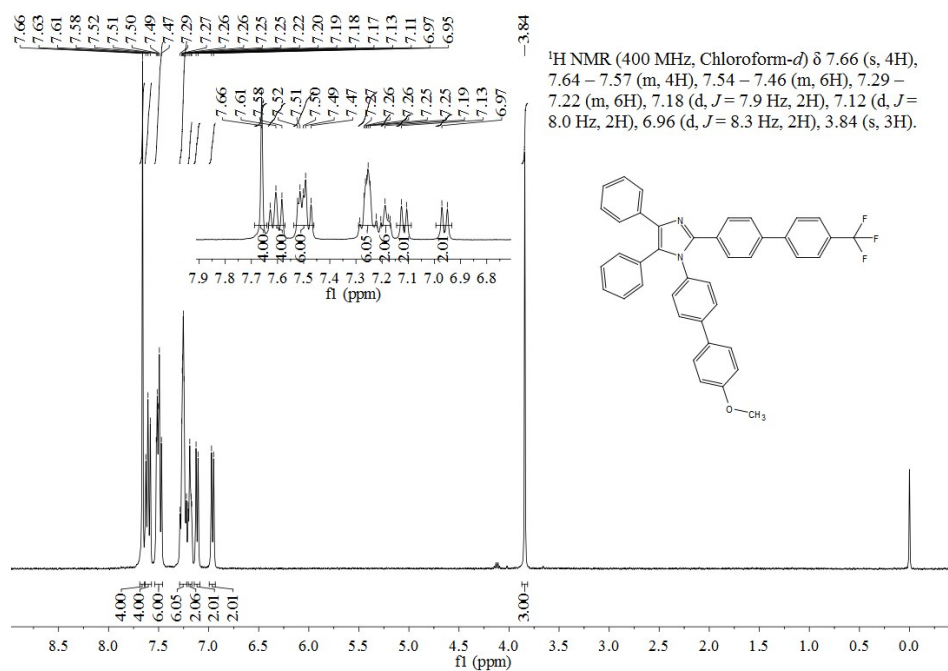

Fig. S10  $^1\text{H}$  NMR spectrum of compound 2d.

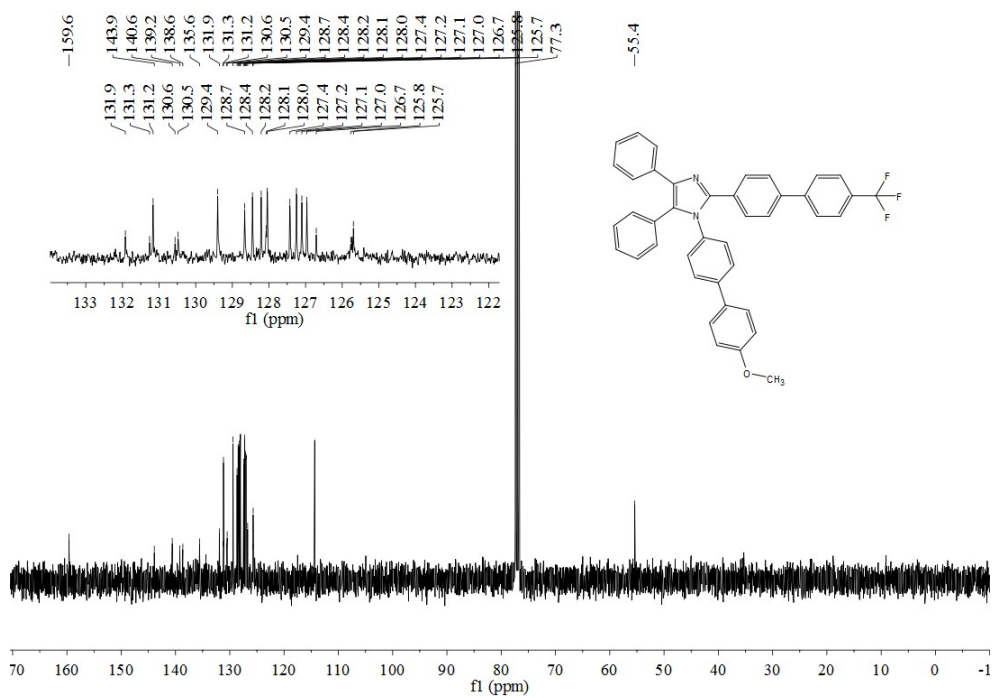

Fig. S11  $^{13}\text{C}$  NMR spectrum of compound **2d**.

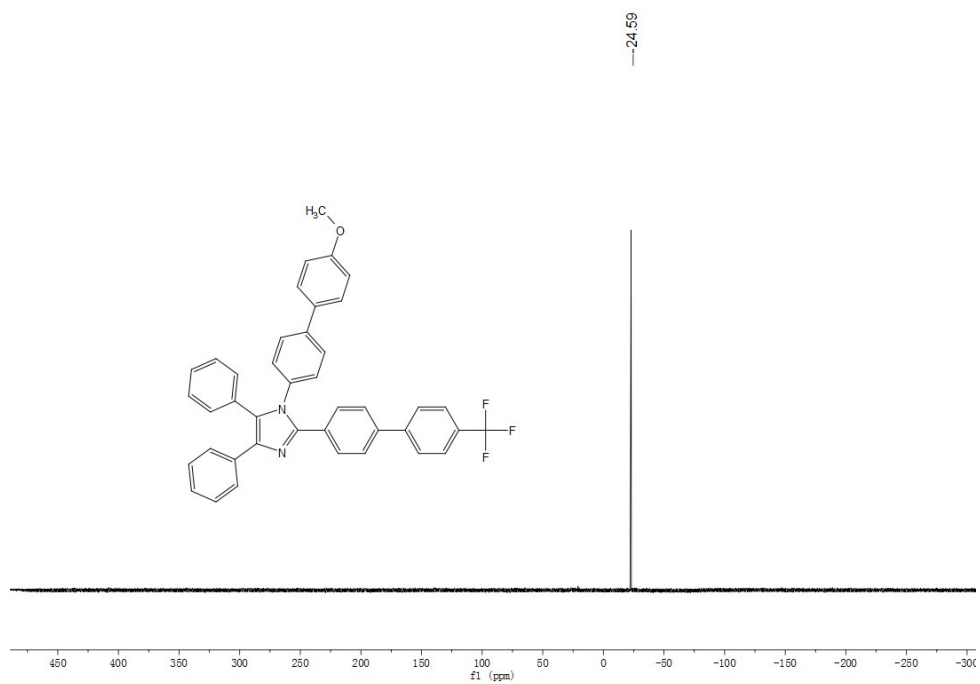

Fig. S12  $^{19}\text{F}$  NMR spectrum of compound **2d**.

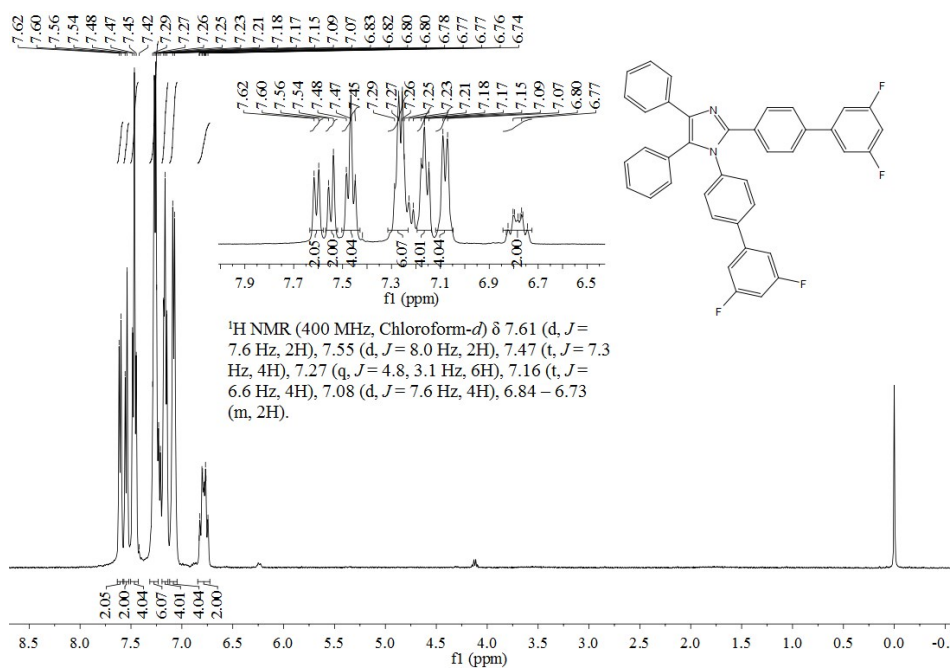

Fig. S13  $^1\text{H NMR}$  spectrum of compound **2e**.

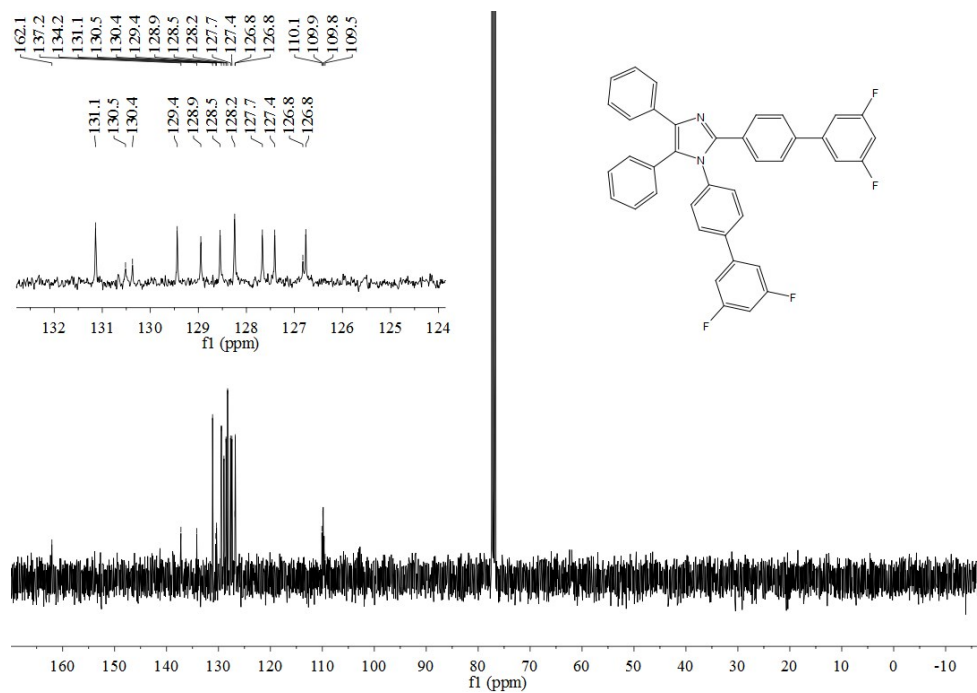

Fig. S14  $^{13}\text{C NMR}$  spectrum of compound **2e**.

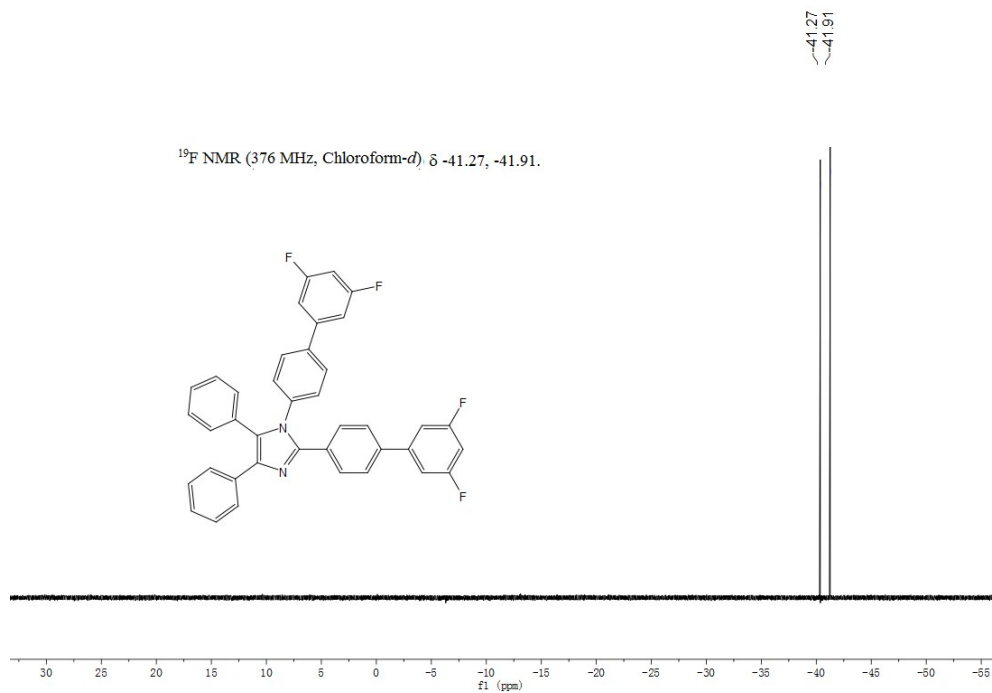

Fig. S15  $^{19}\text{F}$  NMR spectrum of compound 2e.

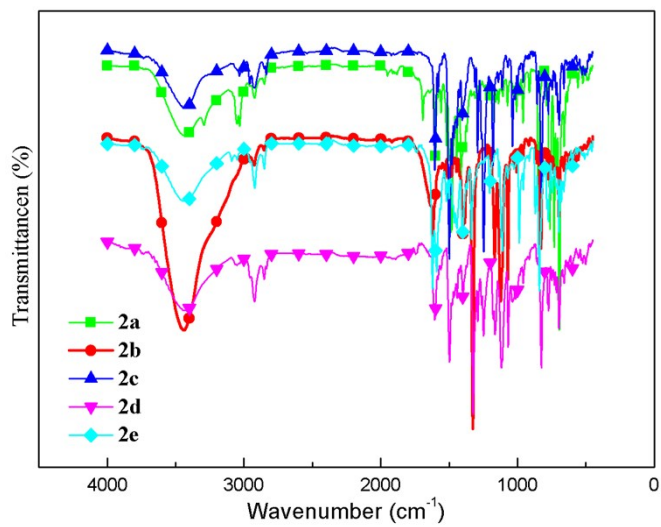

Fig. S16 IR spectra of compounds 2a-2e.



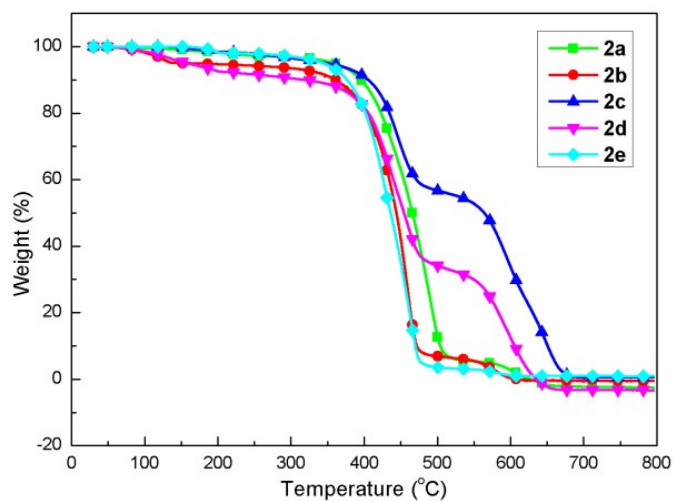

Fig. S17 TGA curves of compounds **2a-2e**.

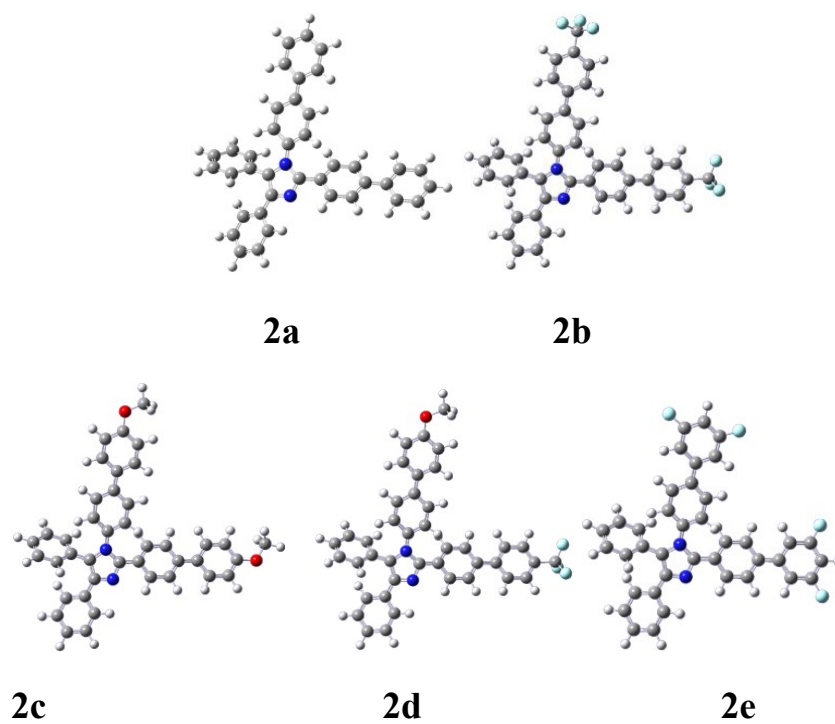

Detailed description of Fig. S18 (continued): To the left of the table is a schematic diagram of the molecular structure. It shows a central nitrogen atom (N) bonded to two benzimidazole-like rings. Six phenyl rings are attached to the structure at various positions. The twist angles  $\theta_1$  through  $\theta_6$  are indicated by red arcs between the phenyl rings and the benzimidazole rings.

| Compounds | $\theta_1$ | $\theta_2$ | $\theta_3$ | $\theta_4$ | $\theta_5$ | $\theta_6$ |
|-----------|------------|------------|------------|------------|------------|------------|
| 2a        | 51.78      | 13.61      | 17.31      | 5.17       | 27.04      | 5.53       |
| 2b        | 51.81      | 13.58      | 17.22      | 5.44       | 27.08      | 5.21       |
| 2c        | 51.85      | 13.62      | 17.34      | 5.12       | 27.03      | 5.28       |
| 2d        | 51.75      | 13.48      | 17.25      | 5.18       | 27.06      | 5.17       |
| 2e        | 51.80      | 13.55      | 17.27      | 5.11       | 27.09      | 5.54       |

Fig. S18 Optimized geometries and twist angles of the compounds **2a-2e**.

## Solvatochromic effect

The influence of solvent environment on the optical property of the compounds **2a-2e** can be studied according to the Lippert-Mataga equation as below:

$$hc(\nu_a - \nu_f) = hc(\nu_a^0 - \nu_f^0) + \frac{2(\mu_e - \mu_g)}{a^3} f(\epsilon, n)$$

where  $h$  is the Planck constant,  $c$  is the light speed in vacuum,  $f(\epsilon, n)$  is the orientational polarizability of solvents,  $\nu_a^0 - \nu_f^0$  corresponds to the Stokes shifts when  $f$  is zero,  $\mu_e$  is the excited state dipole moment,  $\mu_g$  is the ground-state dipole moment,  $a$  is the solvent Onsager cavity radius,  $M$  is the molecular weight,  $d$  is the density ( $d = 1.0 \text{ g/cm}^3$ ), and  $N$  is Avogadro's number, and  $\epsilon$  and  $n$  are the solvent dielectric and the solvent refractive index, respectively.  $\mu_g$  is estimated at the level of B3LYP/6-31G+(d, p) from Gaussian 09 package.  $f(\epsilon, n)$  and  $a$  can be calculated respectively as follows:

$$f(\epsilon, n) = \frac{\epsilon - 1}{2\epsilon + 1} - \frac{n^2 - 1}{2n^2 + 1}, \quad a = (3M/4\pi Nd)^{1/3}$$

The detailed data are listed in Table S1- S5.

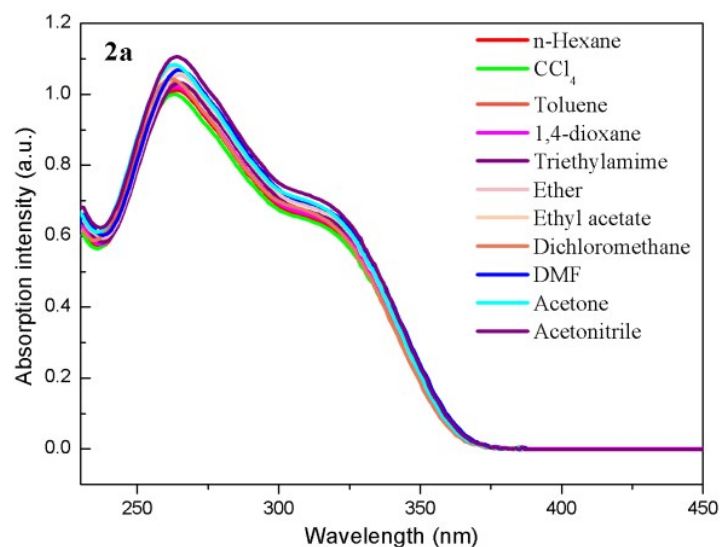

Fig. S19 Absorption spectra of the compound **2a** recorded in different solvents.

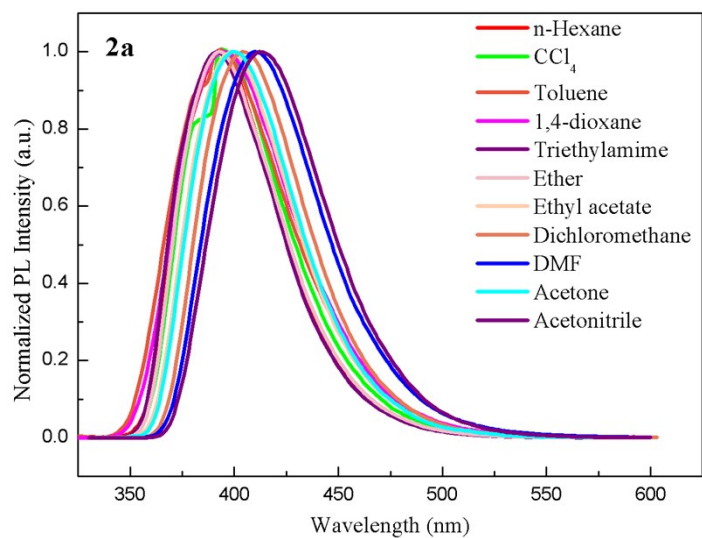

Fig. S20 PL spectra of the compound **2a** recorded in different solvents.

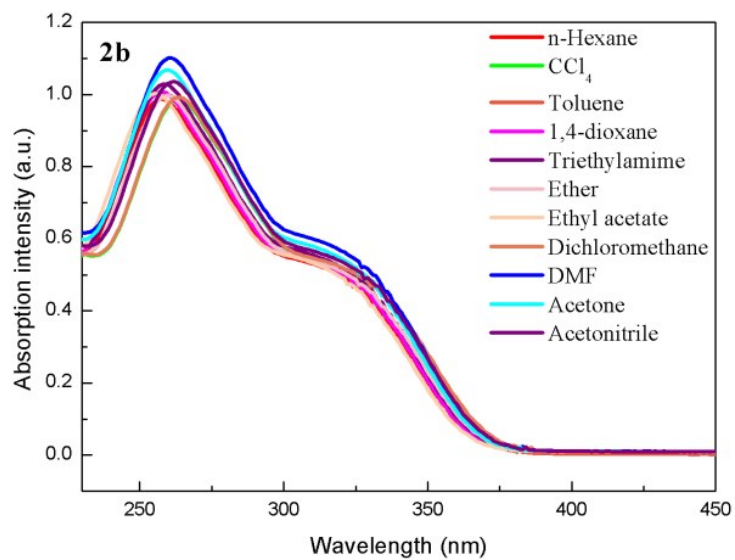

Fig. S21 Absorption spectra of the compound **2b** recorded in different solvents.

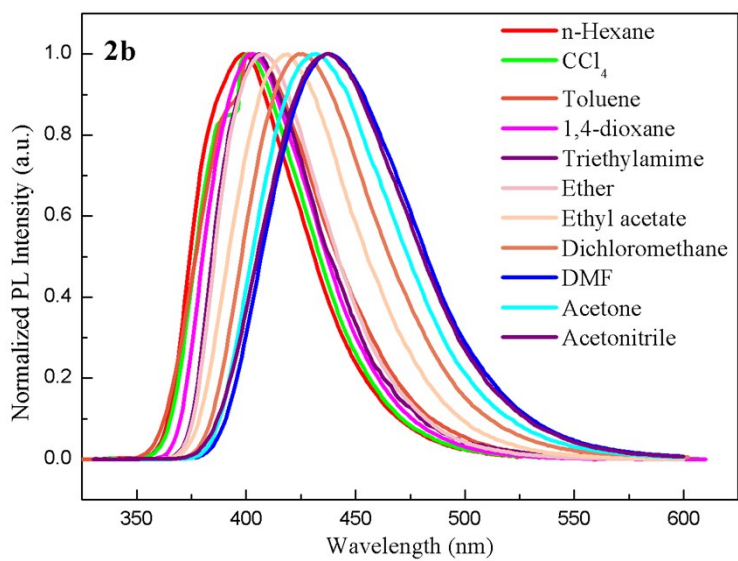

Fig. S22 PL spectra of the compound **2b** recorded in different solvents.

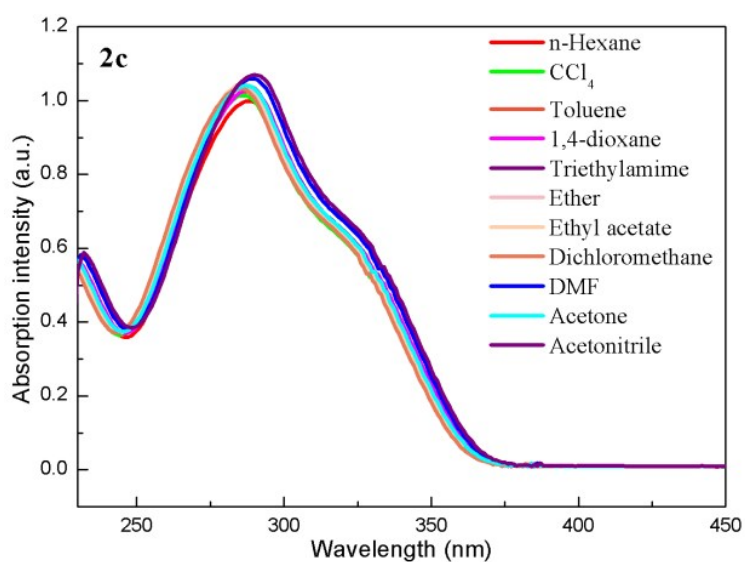

Fig. S23 Absorption spectra of the compound **2c** recorded in different solvents.

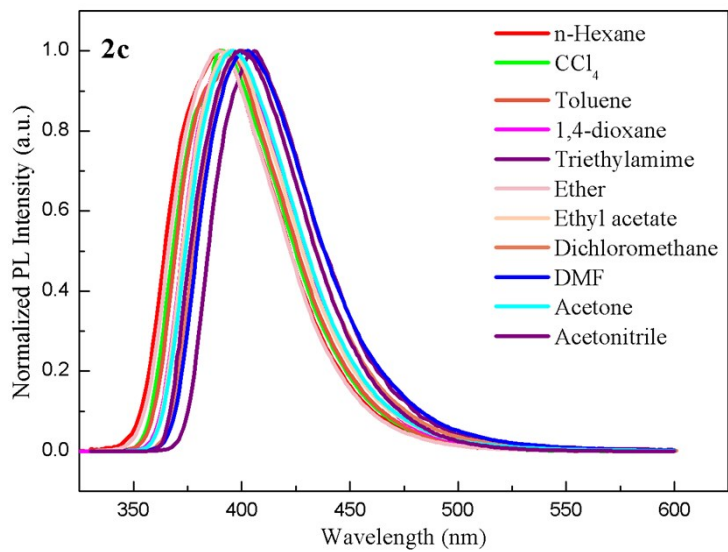

Fig. S24 PL spectra of the compound **2c** recorded in different solvents.

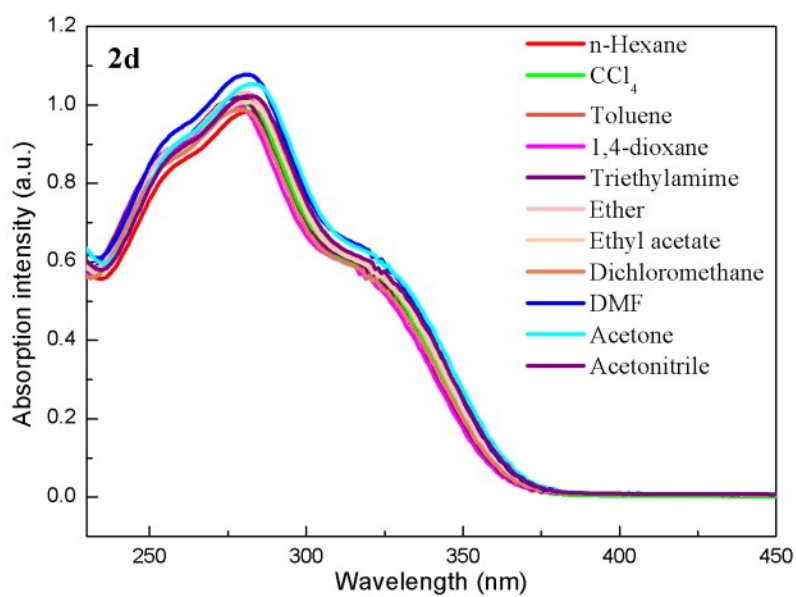

Fig. S25 Absorption spectra of the compound **2d** recorded in different solvents.

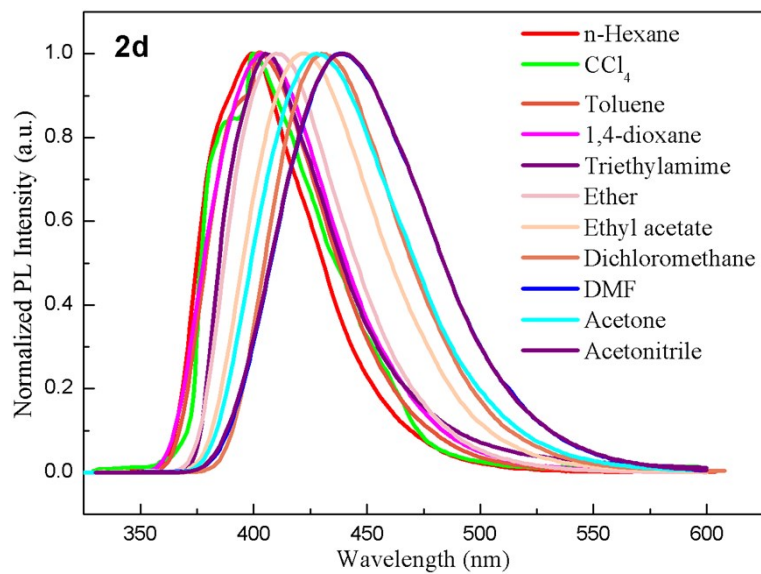

Fig. S26 PL spectra of the compound **2d** recorded in different solvents.

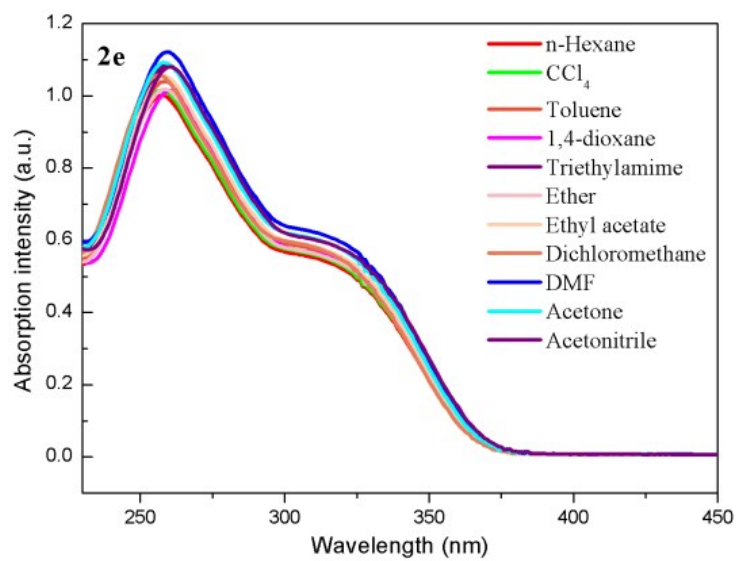

Fig. S27 Absorption spectra of the compound **2e** recorded in different solvents.

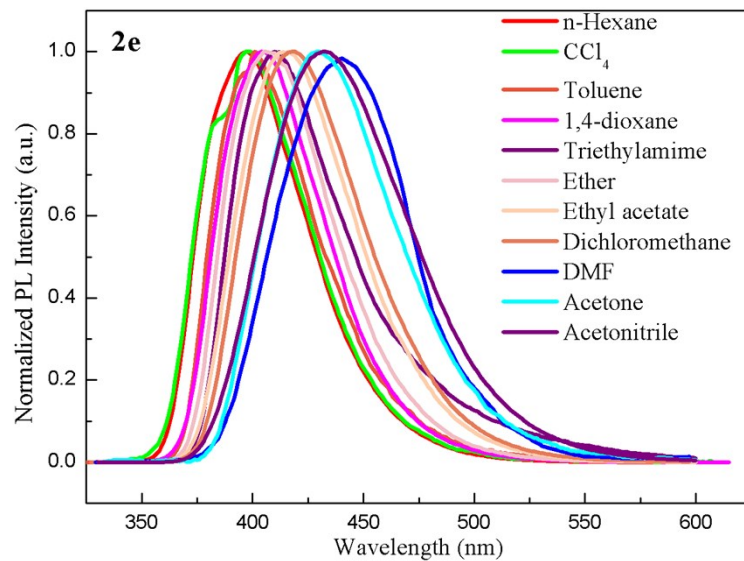

Fig. S28 PL spectra of the compound **2e** recorded in different solvents.

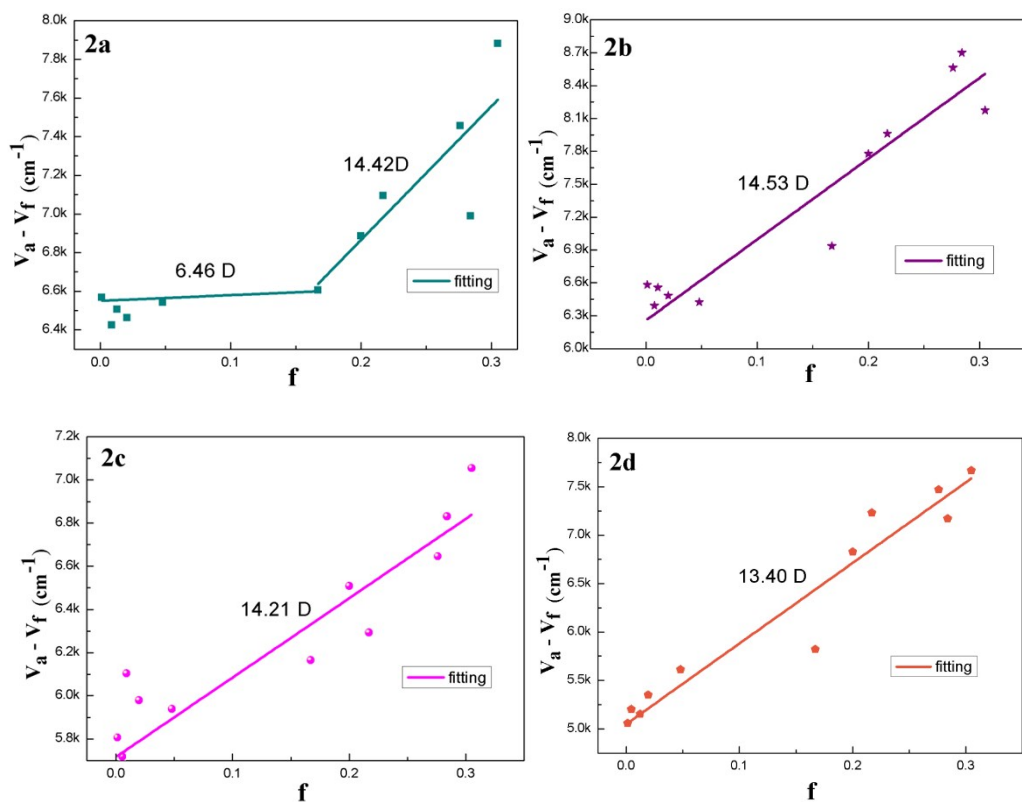

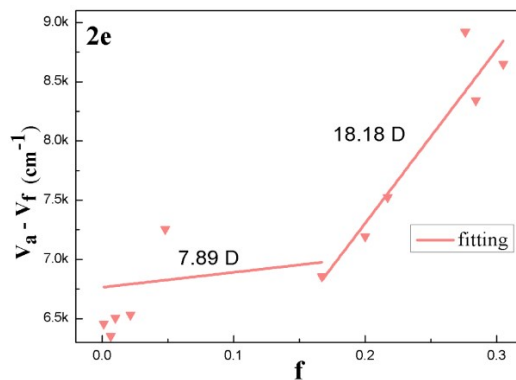

Fig. S29 Plots of the Stokes shift ( $\nu_a - \nu_f$ ) of the new compounds against orientation polarization ( $f$ ) of solvent.

Table S1. Detailed photophysical data of the compound **2a** in different solvents

| Solvents         | $f$    | <b>2a</b>        |                  |                                     |
|------------------|--------|------------------|------------------|-------------------------------------|
|                  |        | $\lambda_a$ (nm) | $\lambda_f$ (nm) | $\nu_a - \nu_f$ (cm <sup>-1</sup> ) |
| Hexane           | 0.0012 | 313              | 394              | 6568                                |
| CCl <sub>4</sub> | 0.011  | 315              | 395              | 6429                                |
| Toluene          | 0.014  | 313              | 393              | 6504                                |
| 1,4-dioxane      | 0.0252 | 314              | 394              | 6466                                |
| Triethylamine    | 0.048  | 312              | 392              | 6541                                |
| Ether            | 0.167  | 312              | 393              | 6606                                |
| Ethyl acetate    | 0.2    | 313              | 399              | 6886                                |
| Dichloromethane  | 0.217  | 314              | 404              | 7095                                |
| DMF              | 0.276  | 314              | 410              | 7457                                |
| Acetone          | 0.284  | 312              | 399              | 6989                                |
| Acetonitrile     | 0.305  | 311              | 412              | 7882                                |



Table S2. Detailed photophysical data of the compound **2b** in different solvents.

| Solvents         | f      | <b>2b</b>        |                  |                                     |
|------------------|--------|------------------|------------------|-------------------------------------|
|                  |        | $\lambda_a$ (nm) | $\lambda_f$ (nm) | $\nu_a - \nu_f$ (cm <sup>-1</sup> ) |
| Hexane           | 0.0012 | 316              | 399              | 6583                                |
| CCl <sub>4</sub> | 0.011  | 319              | 400              | 6348                                |
| Toluene          | 0.014  | 318              | 402              | 6571                                |
| 1,4-dioxane      | 0.0252 | 320              | 403              | 6436                                |
| Triethylamine    | 0.048  | 322              | 406              | 6425                                |
| Ether            | 0.167  | 318              | 408              | 6937                                |
| Ethyl acetate    | 0.2    | 316              | 419              | 7779                                |
| Dichloromethane  | 0.217  | 317              | 424              | 7961                                |
| DMF              | 0.276  | 318              | 437              | 8563                                |
| Acetone          | 0.284  | 314              | 432              | 8699                                |
| Acetonitrile     | 0.305  | 322              | 437              | 8173                                |

Table S3. Detailed photophysical data of the compound **2c** in different solvents.

| Solvents         | f      | <b>2c</b>        |                  |                                     |
|------------------|--------|------------------|------------------|-------------------------------------|
|                  |        | $\lambda_a$ (nm) | $\lambda_f$ (nm) | $\nu_a - \nu_f$ (cm <sup>-1</sup> ) |
| Hexane           | 0.0012 | 318              | 390              | 5806                                |
| CCl <sub>4</sub> | 0.011  | 319              | 391              | 5772                                |
| Toluene          | 0.014  | 317              | 393              | 6101                                |
| 1,4-dioxane      | 0.0252 | 320              | 395              | 5934                                |
| Triethylamine    | 0.048  | 316              | 389              | 5939                                |
| Ether            | 0.167  | 317              | 394              | 6165                                |
| Ethyl acetate    | 0.2    | 318              | 401              | 6509                                |
| Dichloromethane  | 0.217  | 317              | 396              | 6293                                |
| DMF              | 0.276  | 316              | 400              | 6646                                |
| Acetone          | 0.284  | 316              | 403              | 6832                                |

Acetonitrile      0.305      315      405      7055

Table S4. Detailed photophysical data of the compound **2d** in different solvents.

| Solvents         | f      | <b>2d</b>        |                  |                                     |
|------------------|--------|------------------|------------------|-------------------------------------|
|                  |        | $\lambda_a$ (nm) | $\lambda_f$ (nm) | $\nu_a - \nu_f$ (cm <sup>-1</sup> ) |
| Hexane           | 0.0012 | 332              | 399              | 5058                                |
| CCl <sub>4</sub> | 0.011  | 331              | 400              | 5211                                |
| Toluene          | 0.014  | 333              | 402              | 5154                                |
| 1,4-dioxane      | 0.0252 | 332              | 404              | 5368                                |
| Triethylamine    | 0.048  | 330              | 405              | 5612                                |
| Ether            | 0.167  | 331              | 410              | 5821                                |
| Ethyl acetate    | 0.2    | 327              | 421              | 6828                                |
| Dichloromethane  | 0.217  | 328              | 430              | 7232                                |
| DMF              | 0.276  | 330              | 438              | 7472                                |
| Acetone          | 0.284  | 331              | 434              | 7170                                |
| Acetonitrile     | 0.305  | 329              | 440              | 7668                                |

Table S5. Detailed photophysical data of the compound **2e** in different solvents.

| Solvents         | f      | <b>2e</b>        |                  |                                     |
|------------------|--------|------------------|------------------|-------------------------------------|
|                  |        | $\lambda_a$ (nm) | $\lambda_f$ (nm) | $\nu_a - \nu_f$ (cm <sup>-1</sup> ) |
| Hexane           | 0.0012 | 316              | 397              | 6457                                |
| CCl <sub>4</sub> | 0.011  | 318              | 398              | 6320                                |
| Toluene          | 0.014  | 317              | 400              | 6545                                |
| 1,4-dioxane      | 0.0252 | 319              | 404              | 6595                                |
| Triethylamine    | 0.048  | 316              | 410              | 7255                                |
| Ether            | 0.167  | 317              | 405              | 6854                                |
| Ethyl acetate    | 0.2    | 319              | 414              | 7193                                |
| Dichloromethane  | 0.217  | 318              | 418              | 7523                                |
| DMF              | 0.276  | 317              | 442              | 8921                                |

|              |       |     |     |      |
|--------------|-------|-----|-----|------|
| Acetone      | 0.284 | 317 | 431 | 8343 |
| Acetonitrile | 0.305 | 315 | 433 | 8651 |

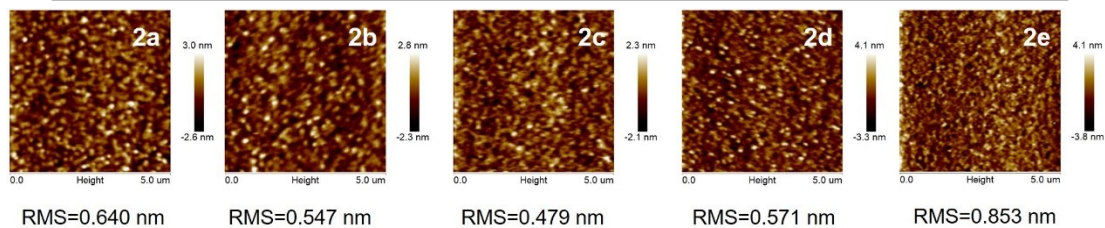

Fig. S30 AFM images of the EMLs in which the compounds **2a-2e** with polymer.

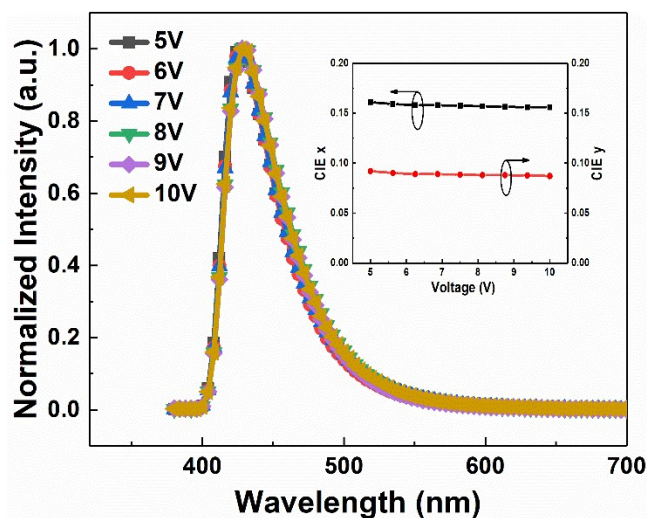

Fig. S31 The EL spectra of compound **2c** based OLED, the inset shows the CIE coordinates of device **III** at different driving voltages.

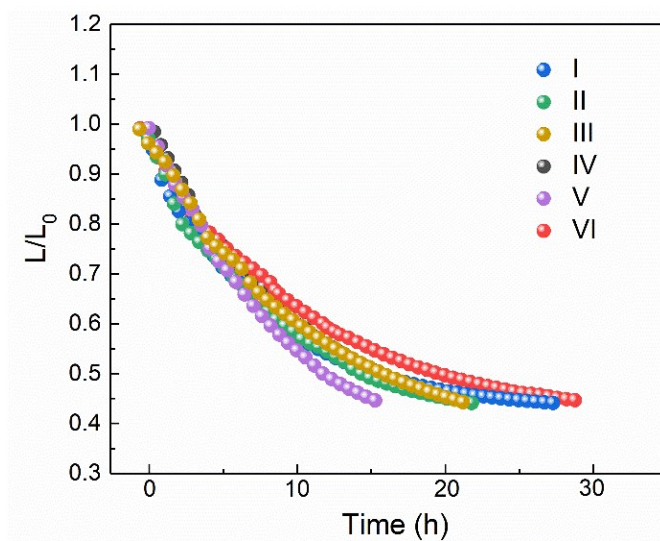

Fig. S32 Lifetime decay curves of the devices **I-VI** at an initial luminance of 2000  $\text{cd/m}^2$ .

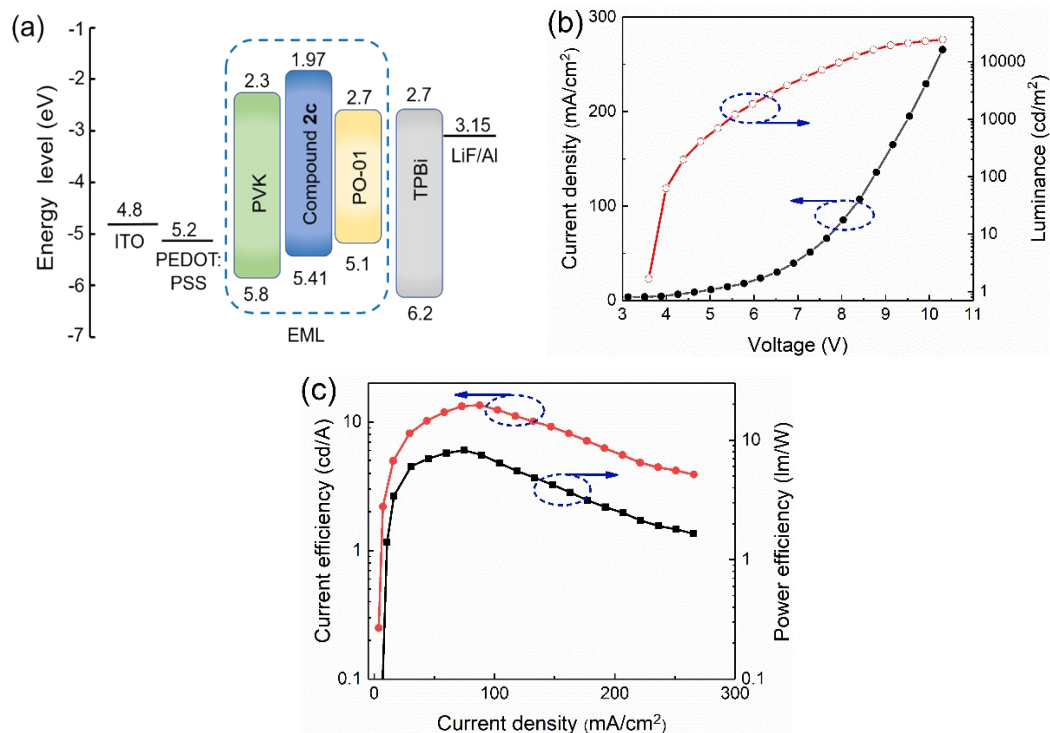

Fig. S33 (a) Energy-level diagram of WOLED; (b)  $J$ - $V$ - $L$  characteristics; (c) CE-current density-PE characteristics.

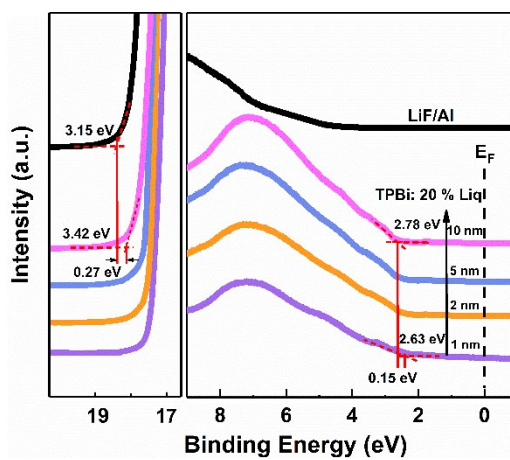

Fig. S34 UPS spectra of TPBi: 20 wt.% Liq film with different thicknesses.

Table S6 Device parameters used to simulate the measured Nyquist impedance spectra.

| Device     | $R_s$ ( $\Omega$ ) | $C_p$ (nF) | $R_p$ (k $\Omega$ ) |
|------------|--------------------|------------|---------------------|
| <b>I</b>   | 25.0               | 5.16       | 36.0                |
| <b>II</b>  | 29.9               | 5.61       | 26.3                |
| <b>III</b> | 27.2               | 4.94       | 5.7                 |
| <b>IV</b>  | 41.6               | 5.73       | 11.4                |
| <b>V</b>   | 42.2               | 5.71       | 19.7                |
| <b>VI</b>  | 23.5               | 4.75       | 4.51                |
